# Supplementary material for: Effect of quaternary ammonium surfactants on biomembranes using molecular dynamics simulation
Source: Royal Society of Chemistry journal article supplement (doi:10.1039/d3ra05030k), 2023-01-01
Supplement: d3ra05030k1.pdf [file d3ra05030k1.pdf]

## Electronic Supplementary Information

### Effect of Quaternary Ammonium Surfactants on Biomembranes using Molecular Dynamics Simulation

Sedigheh Saddat Moosavi, Amin Reza Zolghadr\*

Department of Chemistry, Shiraz University, Shiraz, 71946-84795, Iran

\*Corresponding author: [arzolghadr@shirazu.ac.ir](mailto:arzolghadr@shirazu.ac.ir); Tel: +98 713 613 7157, Fax: +98 713 646 0788, ORCID:

0000-0002-6289-3794 (A.R.Z)

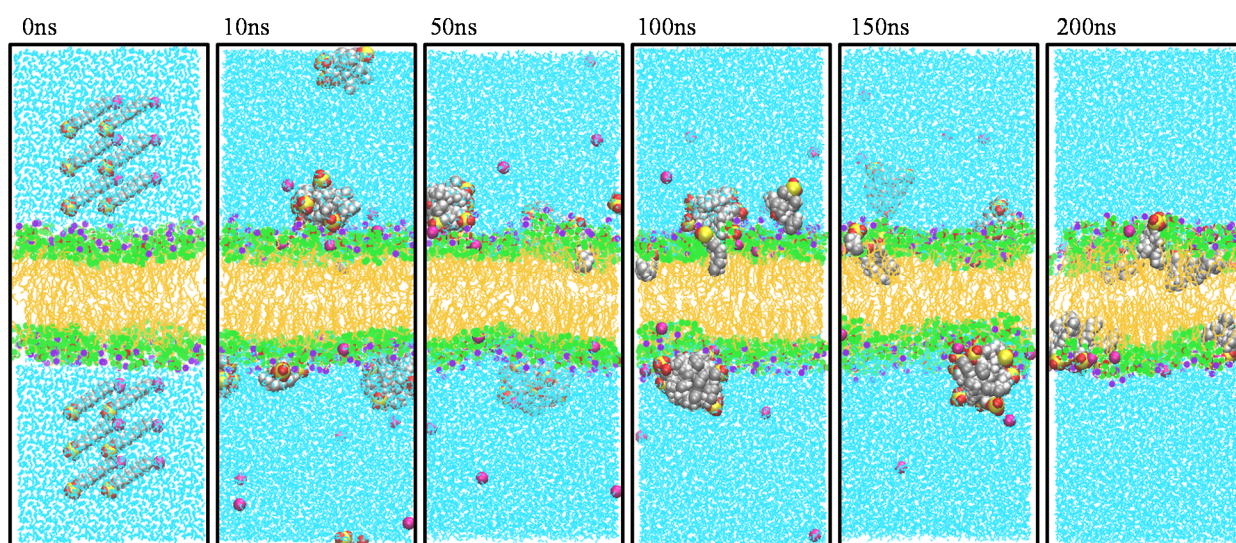

**Fig. S1.** Snapshots of the bilayer systems during MD simulations of SDS in DPPC/water after 200 ns of simulation. Water molecules are shown with blue lines. Tail and head groups of DPPC are represented in orange lines and green, blue and brown points, respectively.

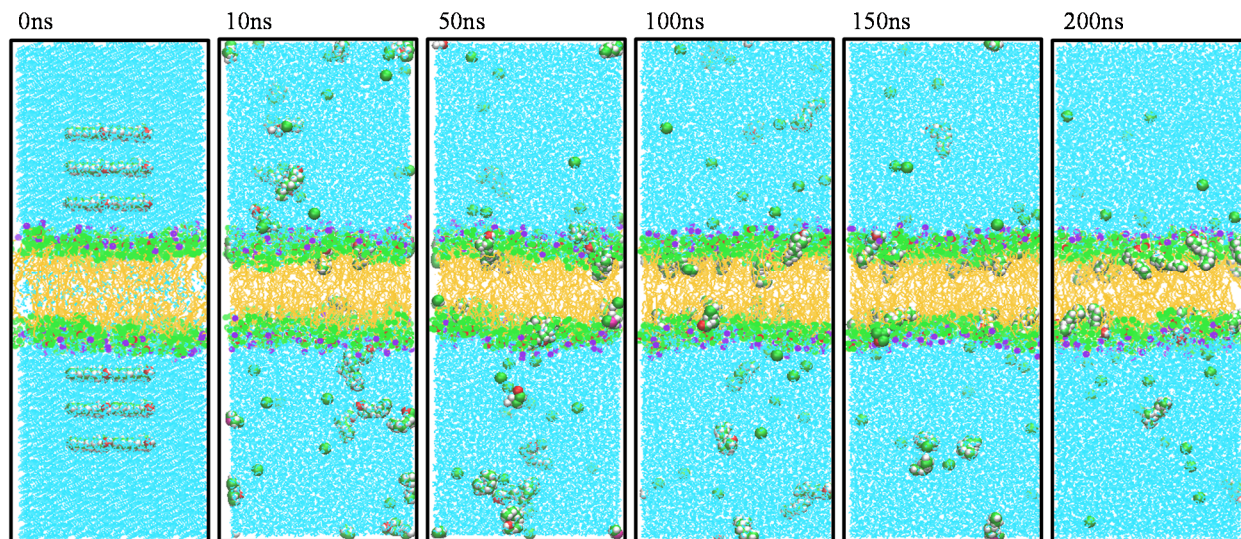

**Fig. S2.** MD simulation sample snapshots of the distribution of HEDMOAC in DPPC/water after 200 ns of simulation. Water molecules are shown with blue lines. Tail and head groups of DPPC are represented in orange lines and green, blue and brown points, respectively.

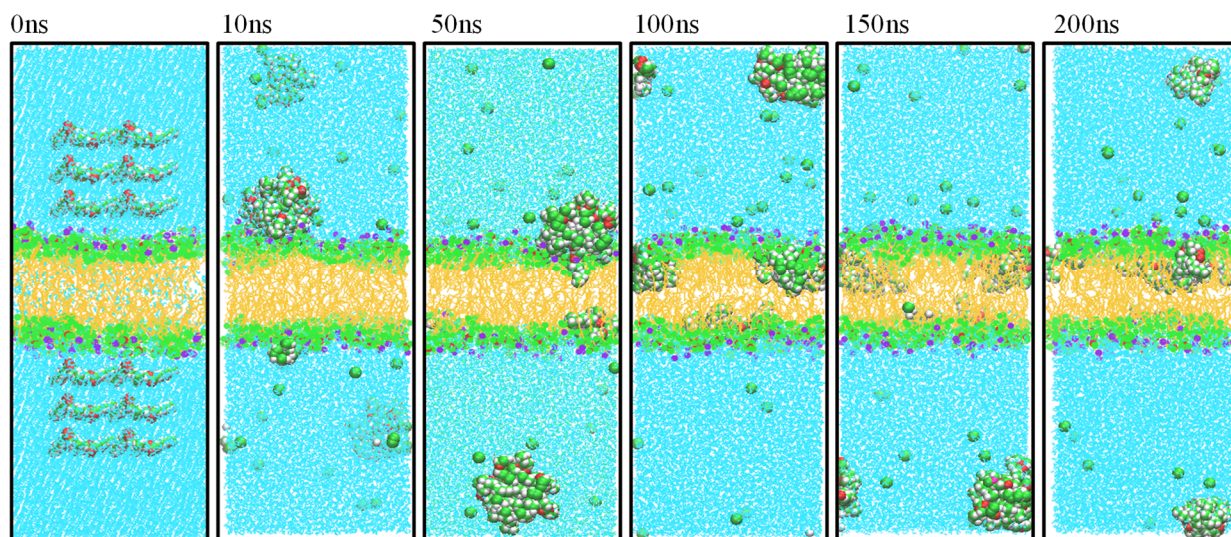

**Fig. S3.** MD simulation sample snapshots of the distribution of DDEDMEAC in DPPC/water after 200 ns of simulation. Water molecules are shown with blue lines. Tail and head groups of DPPC are represented in orange lines and green, blue and brown points, respectively.

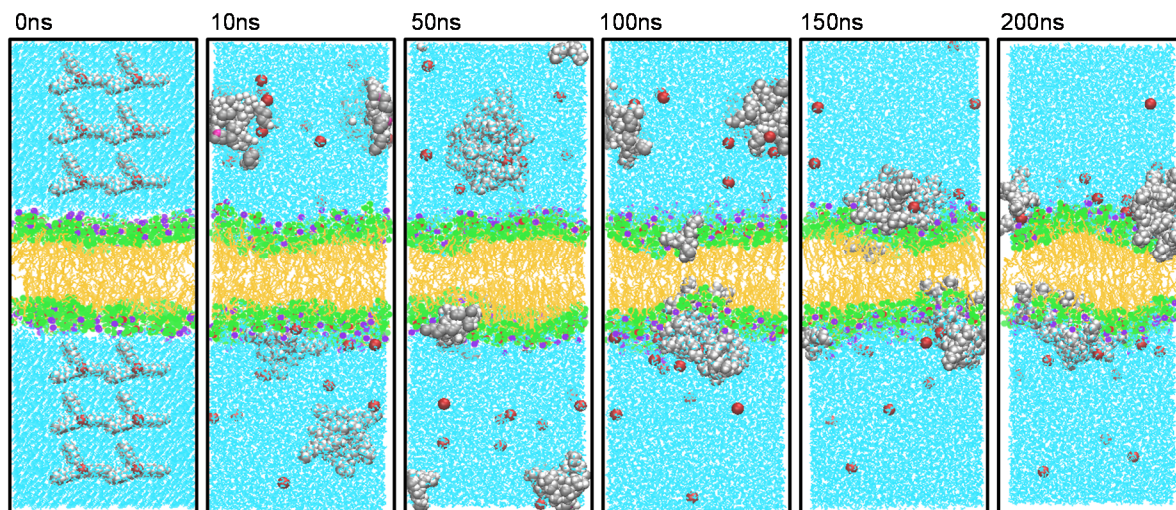

**Fig. S4.** MD simulation sample snapshots of the distribution of TOABr in DPPC/water after 200 ns of simulation. Water molecules are shown with blue lines. Tail and head groups of DPPC are represented in orange lines and green, blue and brown points, respectively.

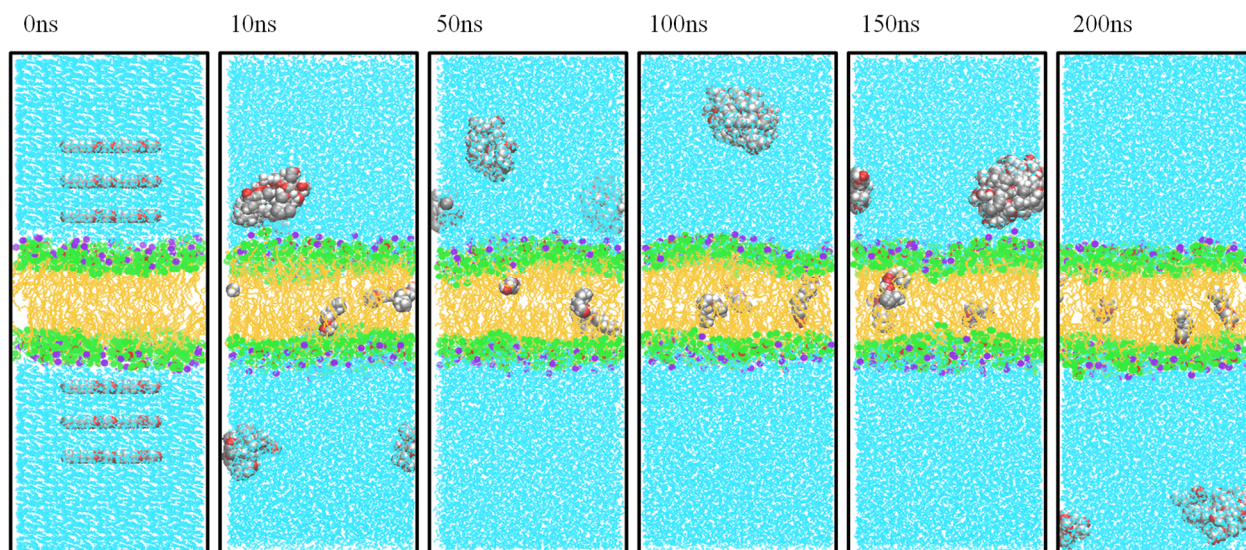

**Fig. S5.** MD simulation sample snapshots of the distribution of OMEO in DPPC/water after 200 ns of simulation. Water molecules are shown with blue lines. Tail and head groups of DPPC are represented in orange lines and green, blue and brown points, respectively.

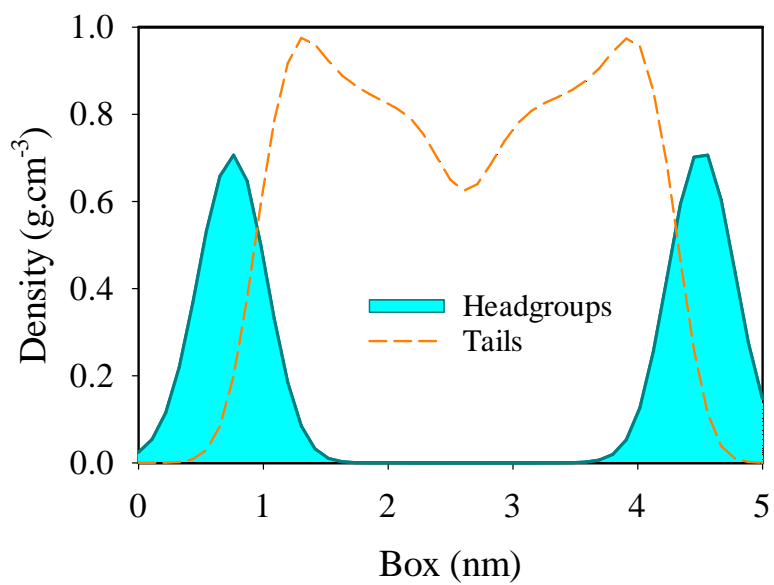

**Fig. S6.** Density profiles of the headgroups, the lipid tail obtained from the trajectories of the control system.<sup>50</sup>

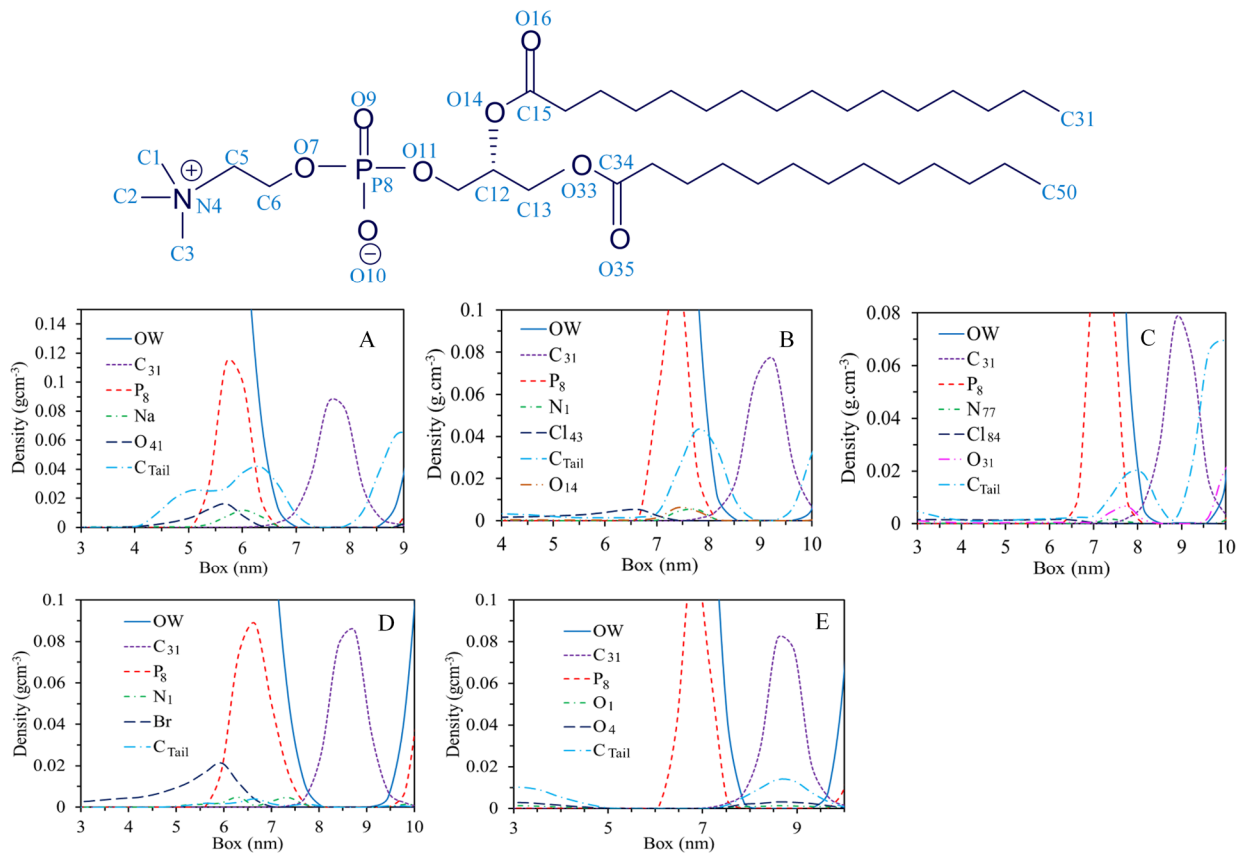

**Fig. S7** Density profiles of specific atom/groups relative to the z-axis, perpendicular to the plane of the bilayer, exploited from the MD simulations performed at  $T = 310$  K, for (A) DPPC/SDS (B) DPPC/HEDMOAC (C) DPPC/DDEDMEAC (D) DPPC/TOABr and (E) DPPC/OMEEO systems.

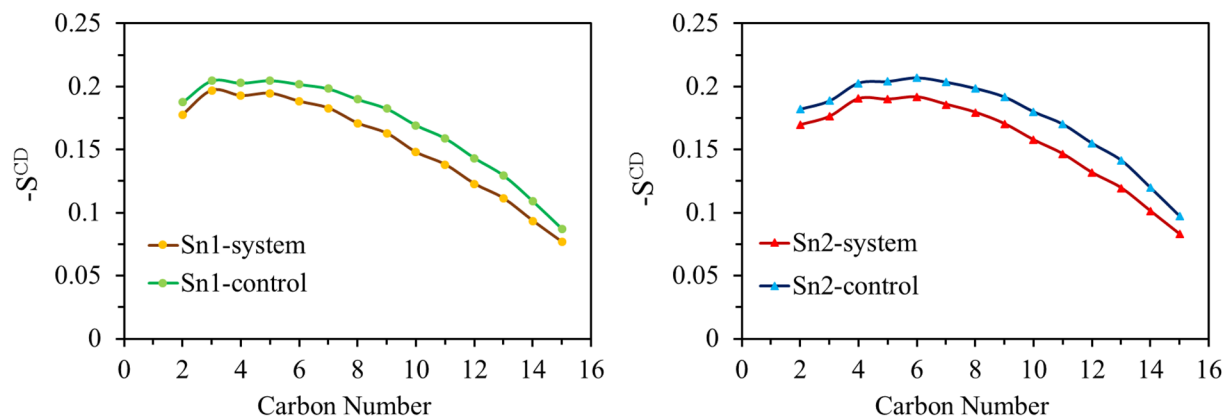

**Fig. S8.** (A) Average deuterium order parameters obtained for the sn-1 (B) and sn-2 chains of DPPC over the 150 ns of the simulation for HEDMOAC system. The calculated values of the control system are also shown.

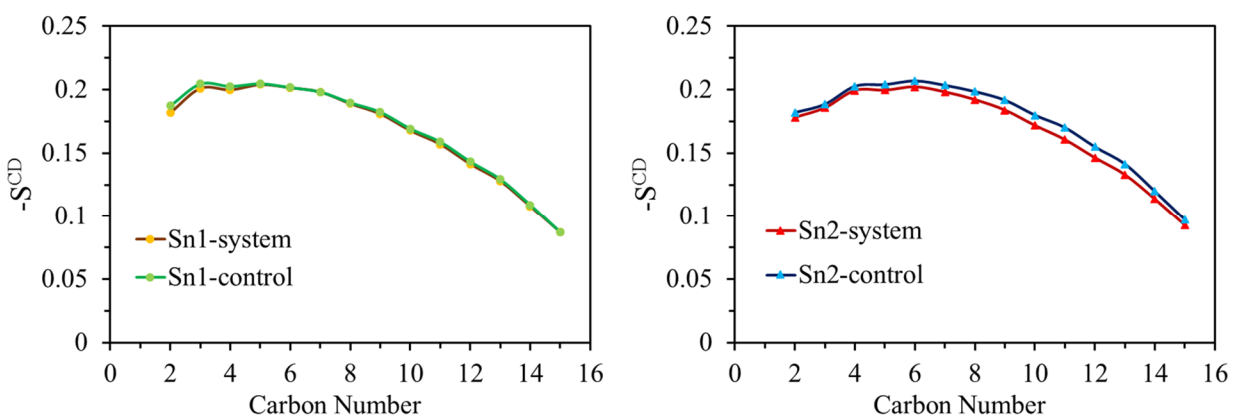

**Fig. S9.** (A) Average deuterium order parameters obtained for the sn-1 (B) and sn-2 chains of DPPC over the 150 ns of the simulation for DDEDMEAC system. The calculated values of the control system are also shown.

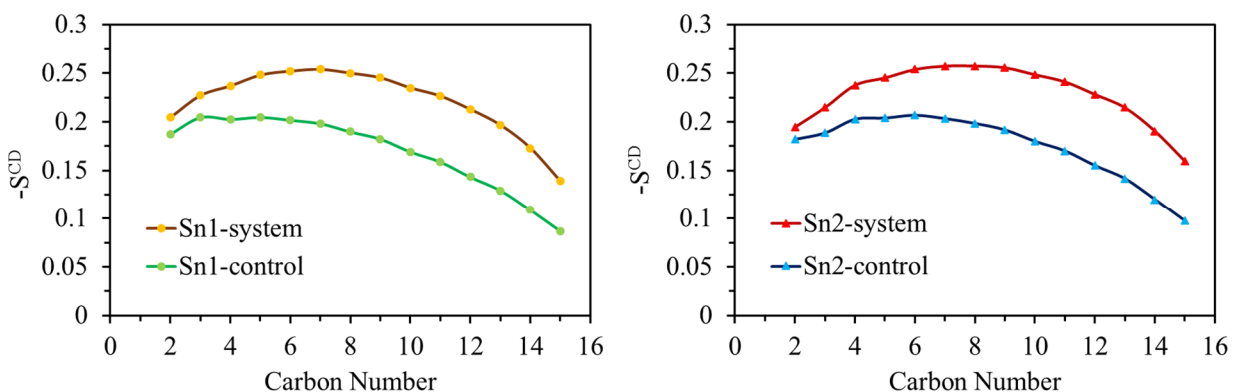

**Fig. S10.** (A) Average deuterium order parameters obtained for the sn-1 (B) and sn-2 chains of DPPC over the 150 ns of the simulation for TOABr system. The calculated values of the control system are also shown.

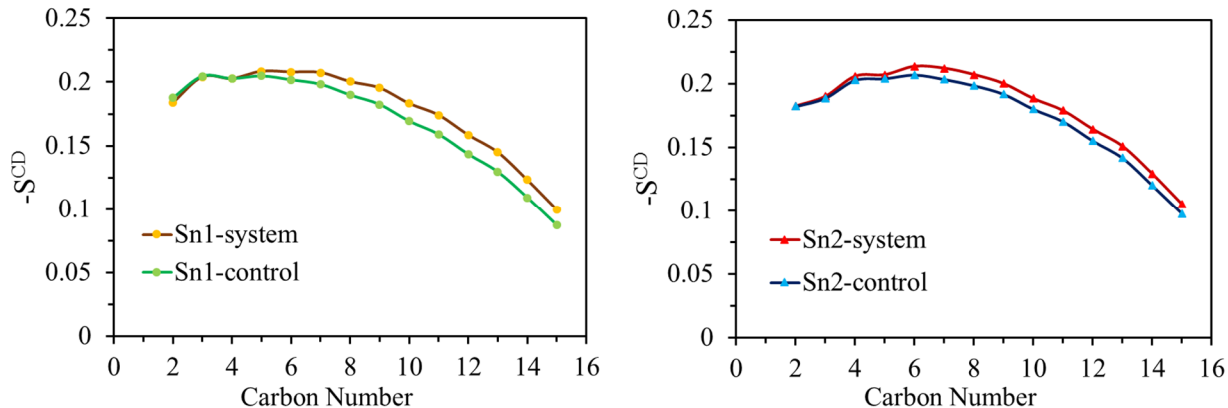

**Fig. S11.** (A) Average deuterium order parameters obtained for the sn-1 (B) and sn-2 chains of DPPC over the 150 ns of the simulation for OMEEO system. The calculated values of the control system are also shown.

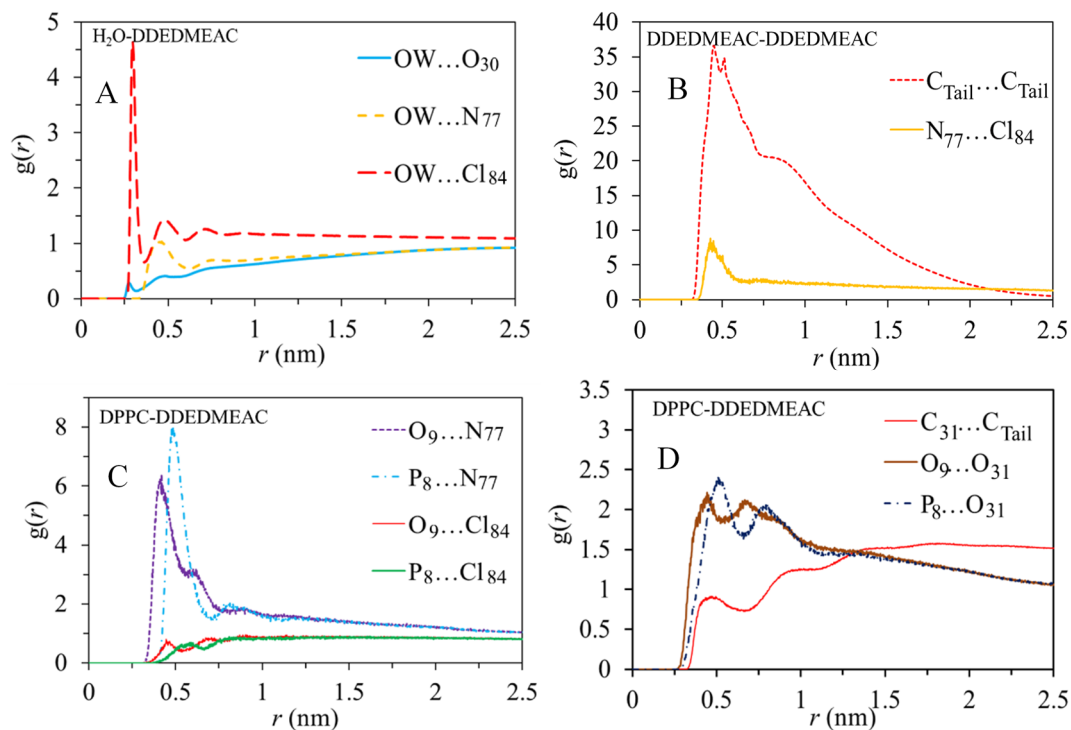

**Fig. S12.** Radial distribution functions of (A) OW with cation, anion and O<sub>30</sub> of DDEDMEAC (B) cation with anion and tail of DDEDMEAC (C) cation and anion of DDEDMEAC with headgroups of DPPC and (D) O<sub>31</sub> and tail of DDEDMEAC with headgroups and tail of DPPC.

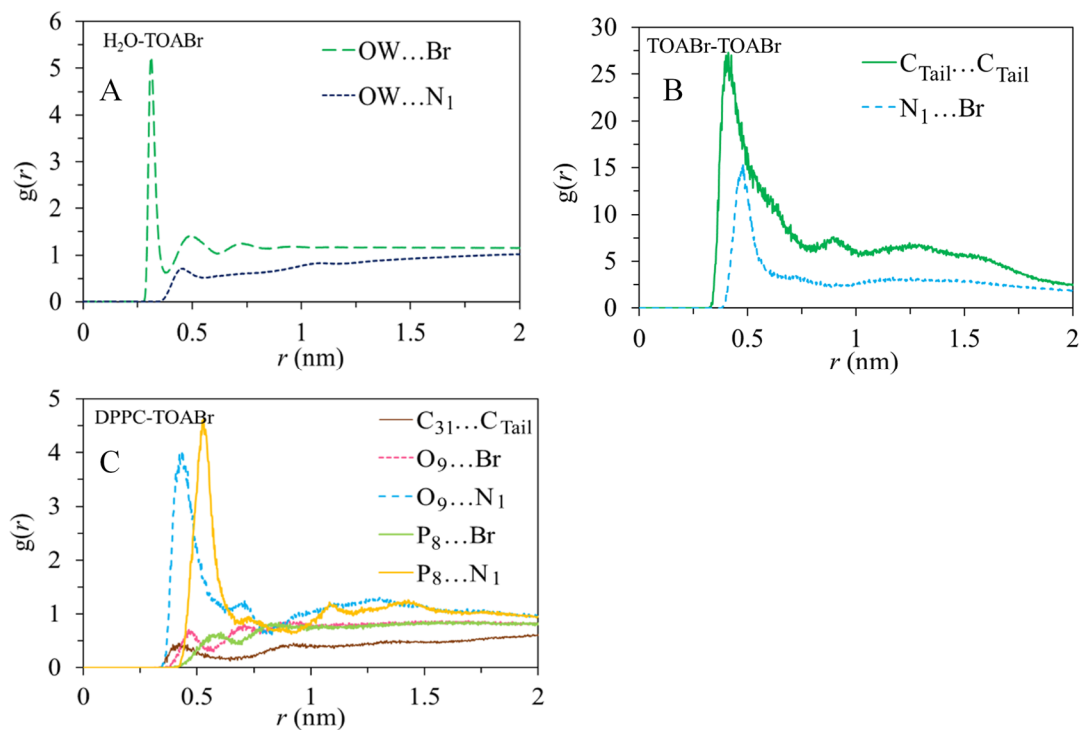

**Fig. S13.** Radial distribution functions of (A) OW with cation and anion of TOABr (B) cation with anion and tail of TOABr (C) cation, anion and tail TOABr with headgroups and tail of DPPC.

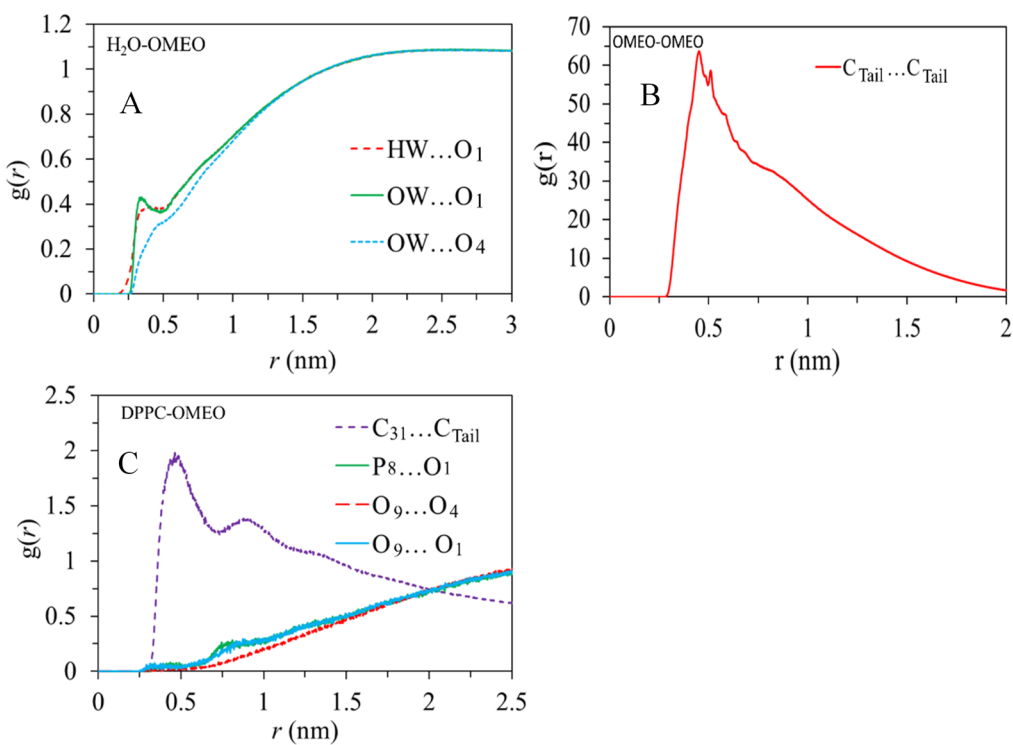

**Fig. S14.** Radial distribution functions of (A) OW and HW with  $O_1$  and  $O_4$  of OMEEO (B) tail of OMEEO (C) headgroups and tail of DPPC with  $O_1$ ,  $O_4$  and tail of OMEEO.



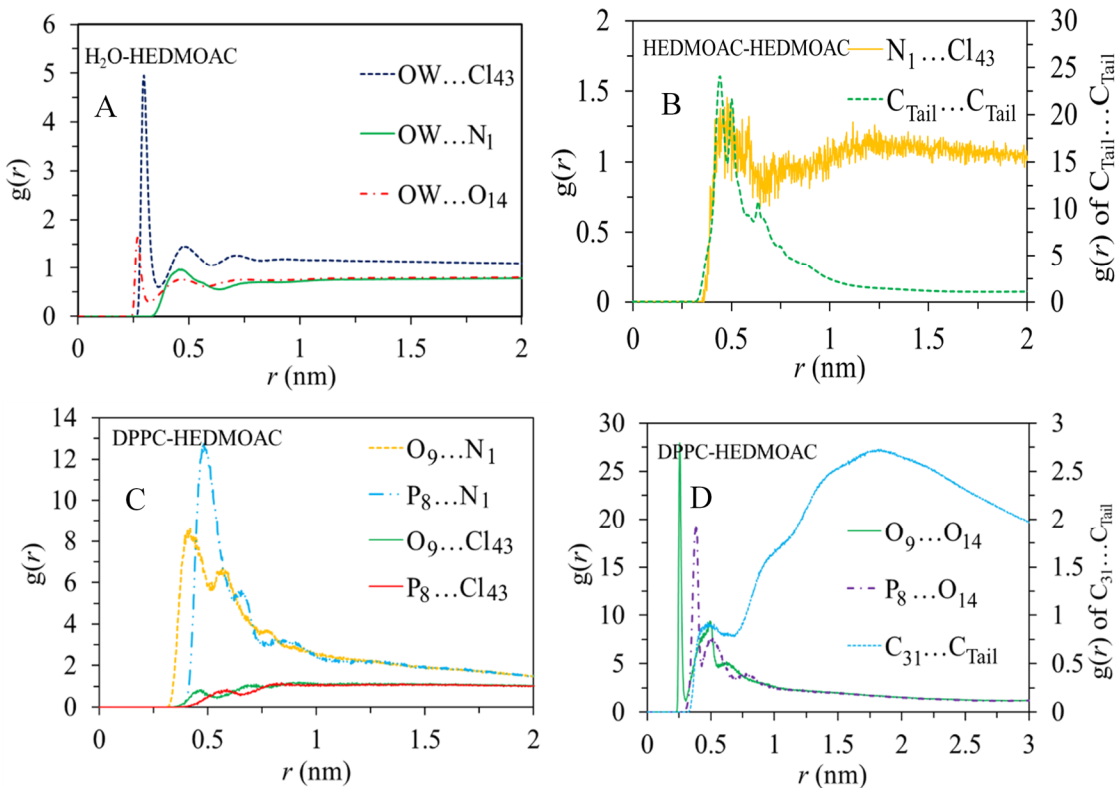

**Fig. S15** Radial distribution functions of (A) OW with cation, anion, and O<sub>14</sub> of HEDMOAC (B) cation with anion of HEDMOAC and tail of HEDMOAC (C) headgroups of DPPC with cation and anion of HEDMOAC (D) O<sub>14</sub> of HEDMOAC with headgroups of DPPC and tail of DPPC with tail of HEDMOAC.

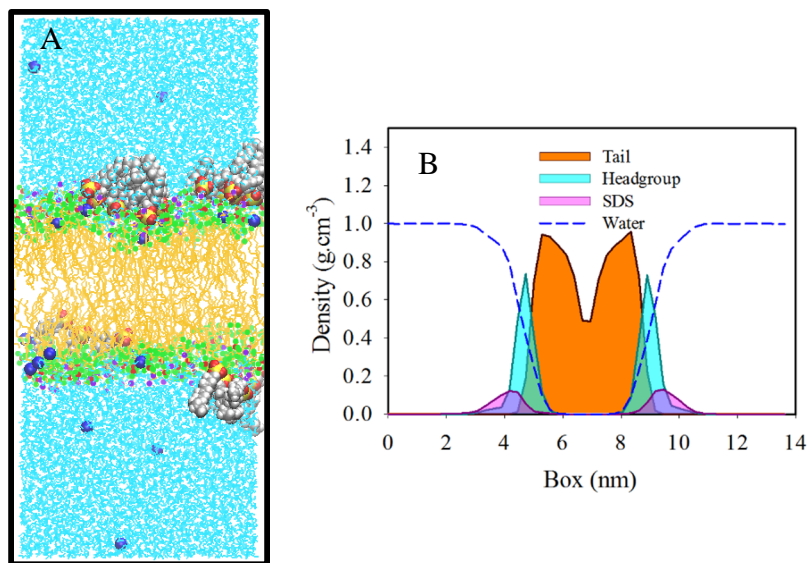

**Fig. S16** (A) Snapshot of the bilayer system during MD simulations of SDS in POPC/water after 50 ns of simulation. (B) Total density profiles of POPC/SDS/water.

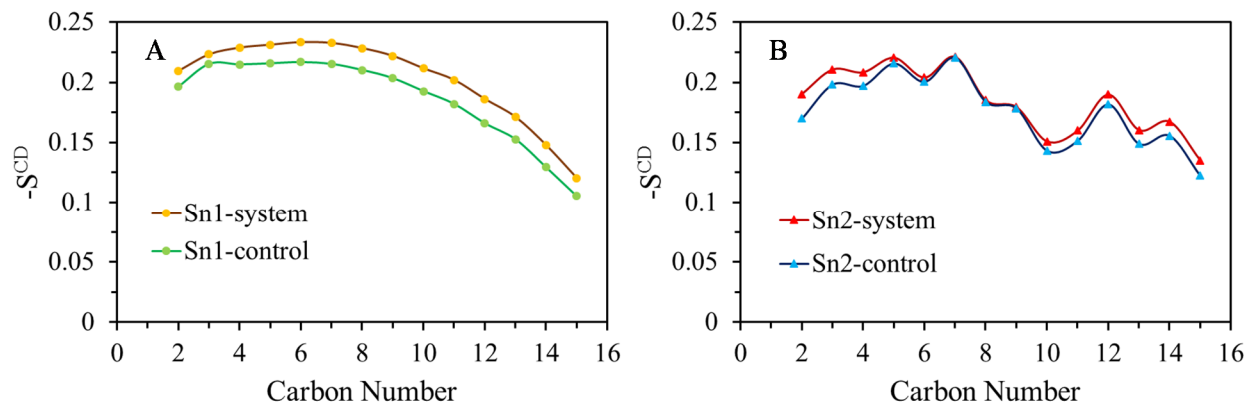

**Fig. S17** (A) Average values of the simulated  $S^{CD}$  in terms of the sn-1 (B) and sn-2 chains of lipid molecules in the POPC model membrane over the 50 ns of the simulation for SDS system. The calculated values of the control system are also shown.

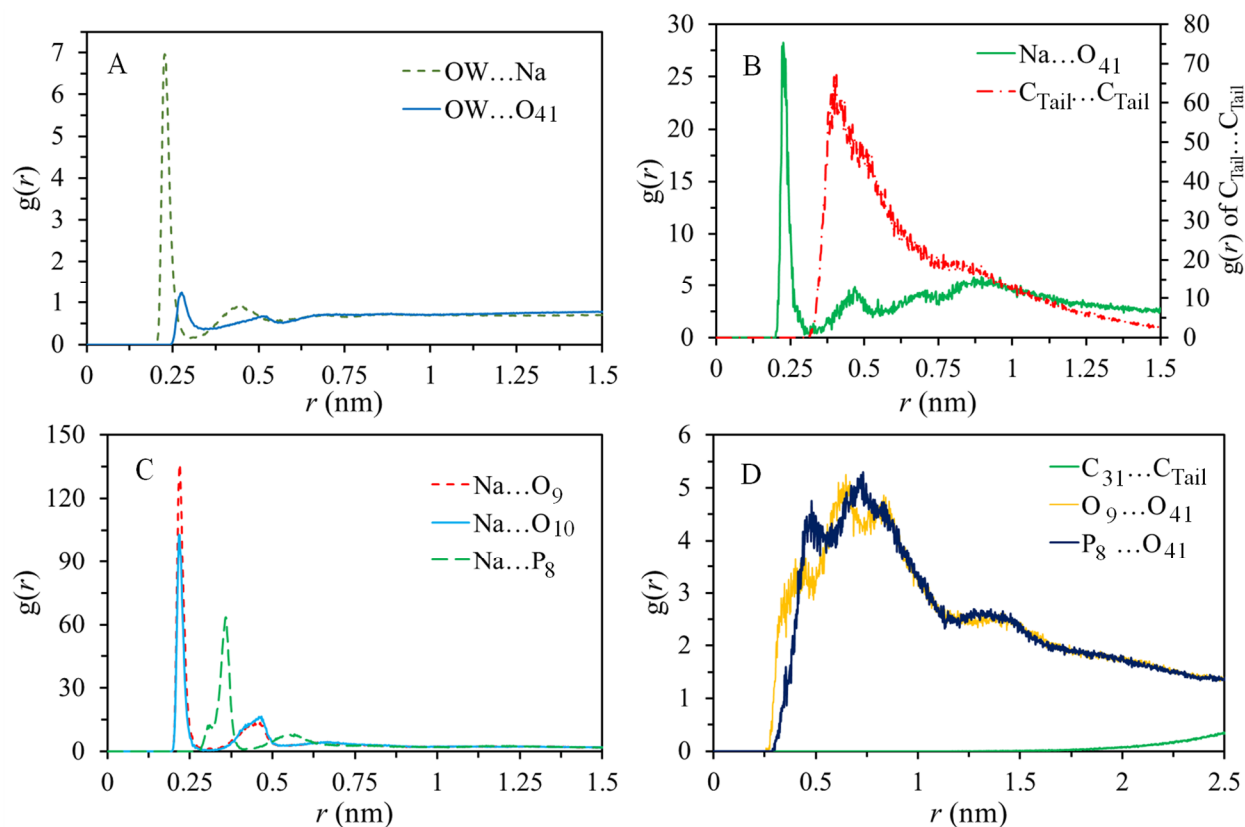

**Fig. S18** Radial distribution functions of (A) OW with cation and anion of SDS (B) cation with anion of SDS and tail of SDS (C) cation of SDS with O<sub>9</sub>, O<sub>10</sub> and P<sub>8</sub> of POPC and (D) tail of SDS with tail of POPC and headgroups of POPC with anion of SDS.

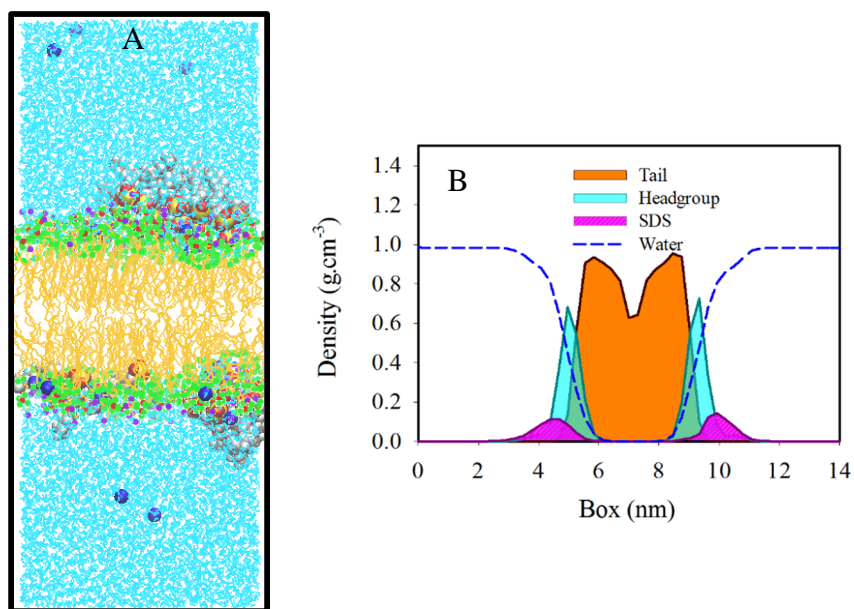

**Fig. S19** (A) Snapshot of the bilayer system during MD simulations of SDS in DPPC/water after 50 ns of simulation. (B) Total density profiles of DPPC/SDS/water.

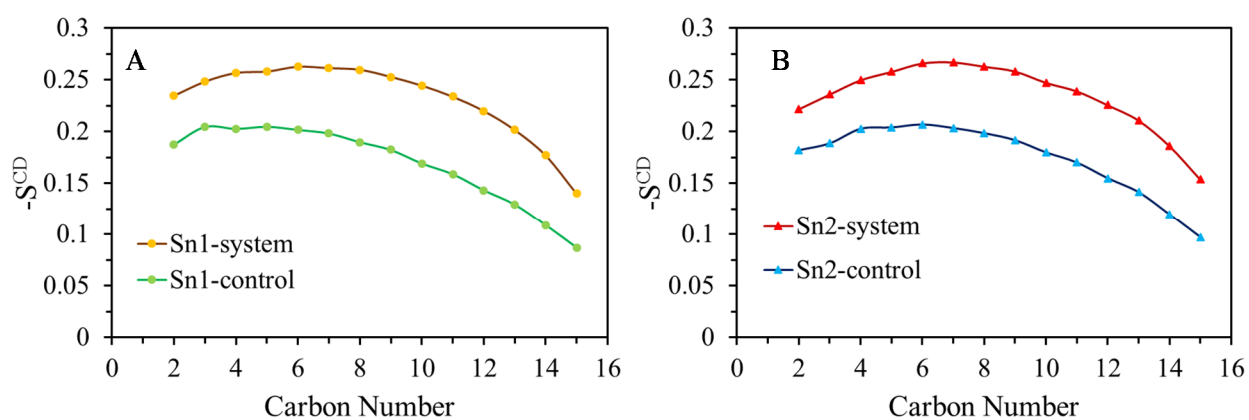

**Fig. S20** (A) Average values of the simulated  $S^{CD}$  in terms of the sn-1 (B) and sn-2 chains of lipid molecules in the DPPC model membrane over the 50 ns of the simulation for SDS system. The calculated values of the control system are also shown.

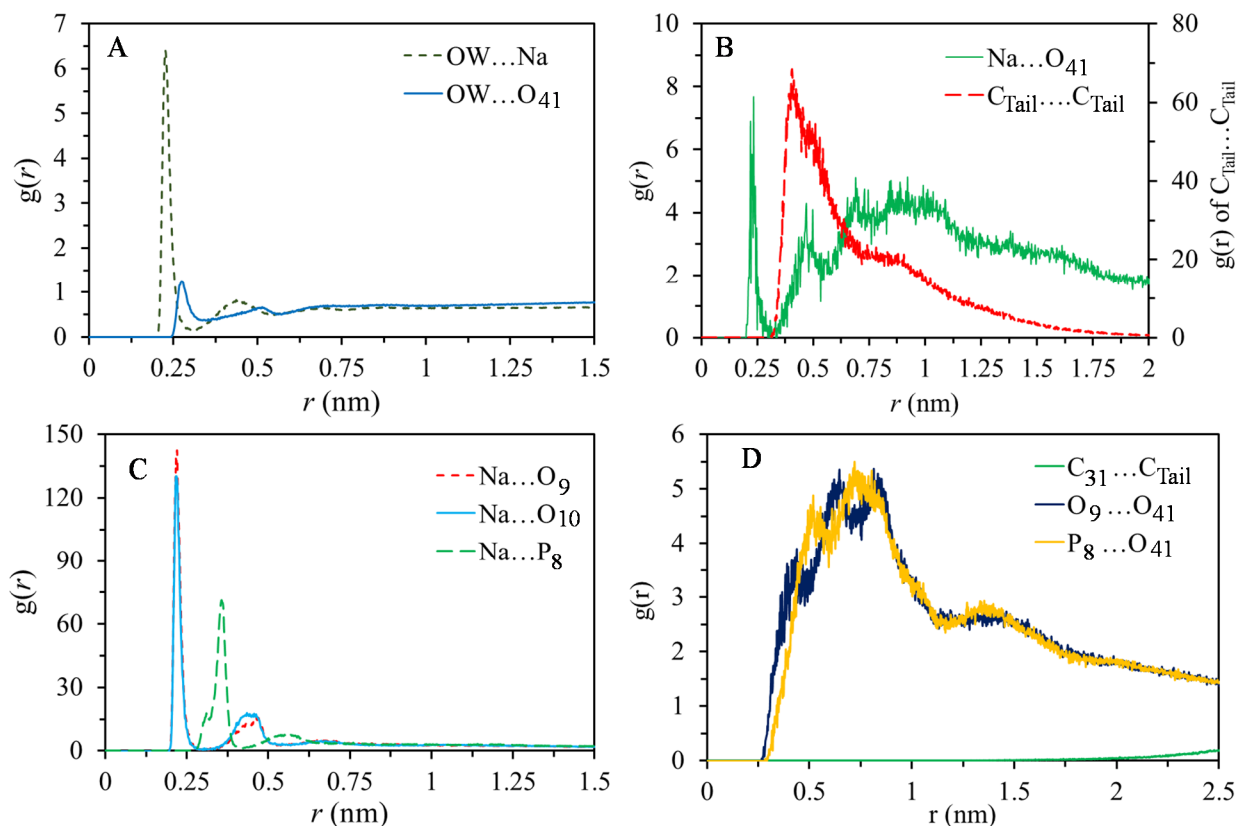

**Fig. S21** Radial distribution functions of (A) OW with cation and anion of SDS (B) cation with anion of SDS and tail of SDS (C) cation of SDS with O<sub>9</sub>, O<sub>10</sub> and P<sub>8</sub> of DPPC and (D) tail of SDS with tail of DPPC and headgroups of DPPC with anion of SDS.

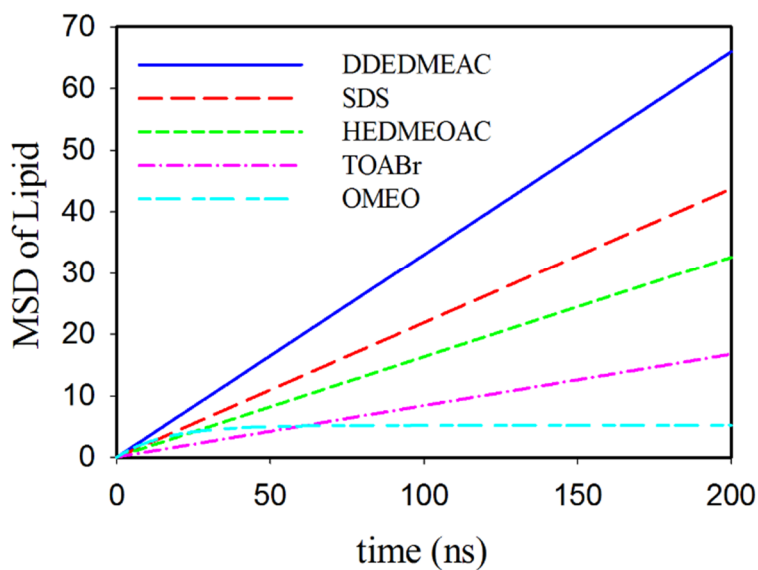

**Fig. S22** Mean-squared displacements of P8 atoms of the phospholipid bilayer in the presence of various surfactants.

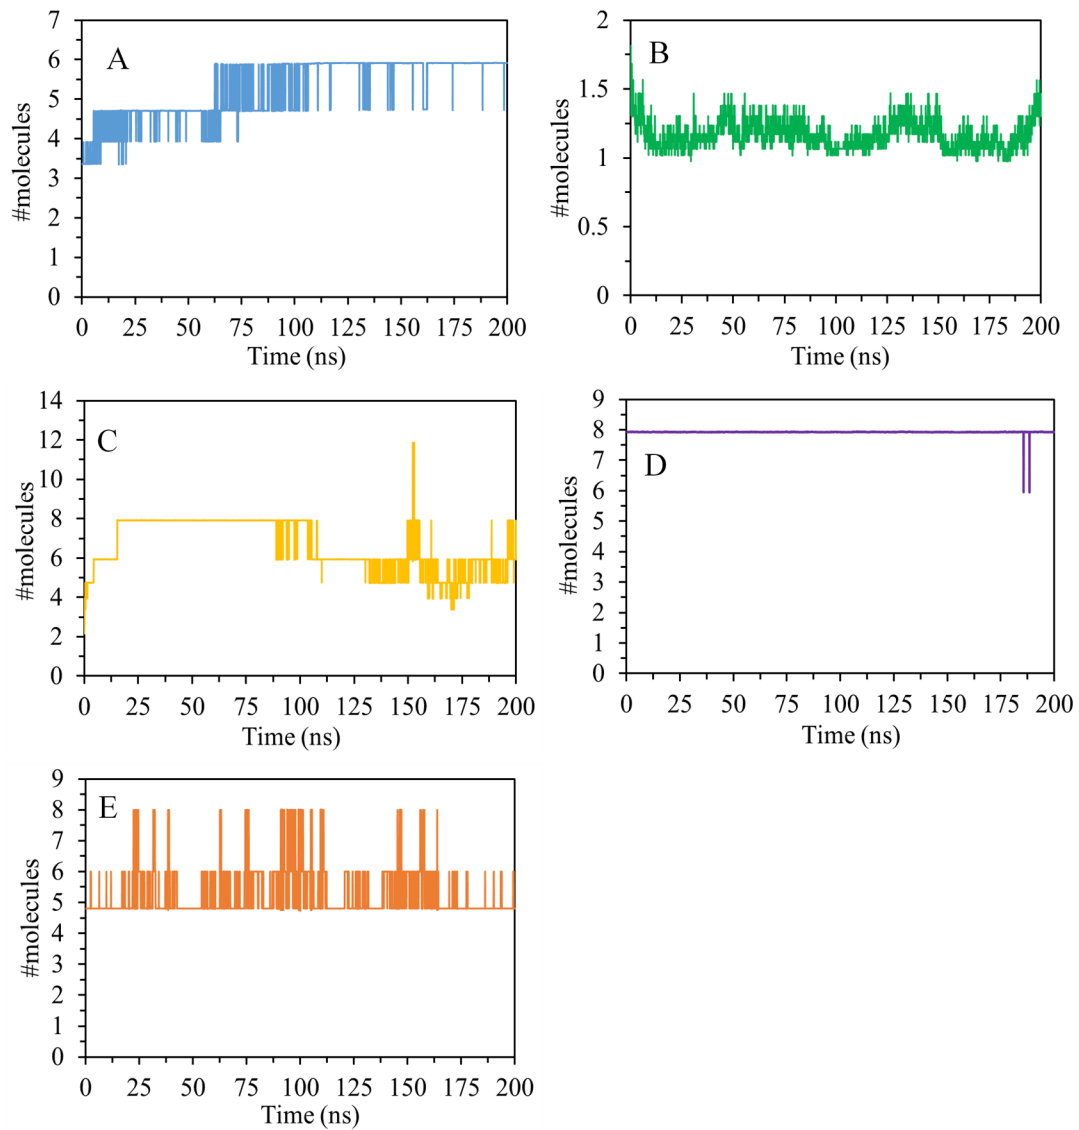

**Fig. S23** Average surfactants cluster sizes from simulations of 24 molecules of (A) SDS (B) HEDMOAC (C) DDEDMEA (D) TOABr (E) OMEO in interface between water and DPPC.

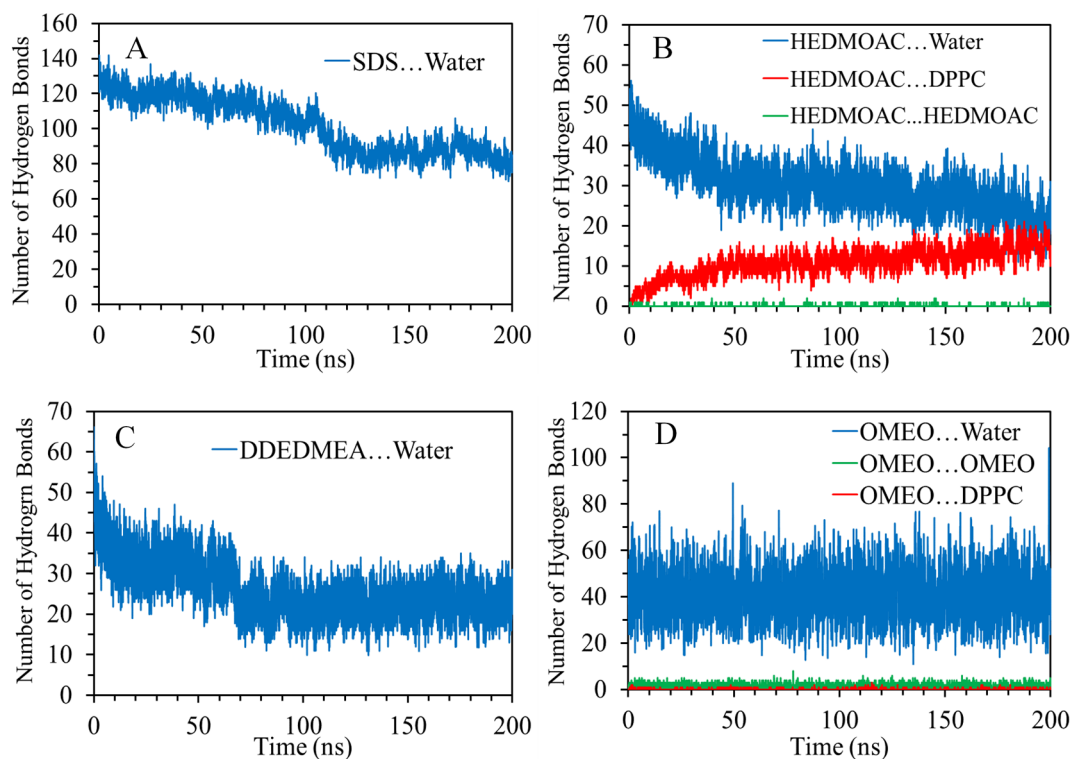

**Fig. S24** Number of hydrogen bonds between (A) SDS...Water, (B) HEDMOAC...Water, HEDMOAC...DPPC and HEDMOAC...HEDMOAC, (C) DDEDMEA...Water and (D) OMEO...Water, OMEO...DPPC and OMEO...OMEQ in the systems of surfactant at the water/DPPC interface after 200ns of simulation.

**Table S1.** *Ab initio* calculated partial atomic charges of SDS.

| atom | $q/e$<br>B3LYP<br>NBO | atom | $q/e$<br>B3LYP<br>NBO | atom | $q/e$<br>B3LYP<br>NBO | atom | $q/e$<br>B3LYP<br>NBO | atom | $q/e$<br>B3LYP<br>NBO |
|------|-----------------------|------|-----------------------|------|-----------------------|------|-----------------------|------|-----------------------|
| C1   | -0.205                | C10  | -0.060                | H19  | 0.036                 | H28  | -0.037                | H37  | -0.011                |
| C2   | 0.214                 | C11  | 0.056                 | H20  | 0.035                 | H29  | -0.033                | H38  | -0.011                |
| C3   | 0.047                 | C12  | 0.341                 | H21  | -0.051                | H30  | -0.032                | H39  | -0.013                |
| C4   | -0.035                | O13  | -0.574                | H22  | -0.051                | H31  | -0.018                | H40  | -0.002                |
| C5   | 0.109                 | S14  | 1.606                 | H23  | -0.022                | H32  | -0.016                | H41  | -0.009                |
| C6   | 0.085                 | O15  | -0.688                | H24  | -0.023                | H33  | -0.024                | H42  | -0.021                |
| C7   | -0.014                | O16  | -0.804                | H25  | -0.010                | H34  | -0.028                | NA43 | 0.956                 |
| C8   | 0.069                 | O17  | -0.802                | H26  | -0.013                | H35  | -0.047                |      |                       |
| C9   | 0.139                 | H18  | 0.043                 | H27  | -0.038                | H36  | -0.044                |      |                       |

**Table S2.** *Ab initio* calculated partial atomic charges of TOABr.

| atom | <i>q/e</i><br>B3LYP<br>NBO | atom | <i>q/e</i><br>B3LYP<br>NBO | atom | <i>q/e</i><br>B3LYP<br>NBO | atom | <i>q/e</i><br>B3LYP<br>NBO | atom  | <i>q/e</i><br>B3LYP<br>NBO |
|------|----------------------------|------|----------------------------|------|----------------------------|------|----------------------------|-------|----------------------------|
| N1   | -0.364                     | C22  | -0.378                     | H43  | 0.189                      | H64  | 0.191                      | H85   | 0.21                       |
| C2   | -0.187                     | C23  | -0.379                     | H44  | 0.186                      | H65  | 0.199                      | H86   | 0.206                      |
| C3   | -0.403                     | C24  | -0.383                     | H45  | 0.189                      | H66  | 0.194                      | H87   | 0.205                      |
| C4   | -0.377                     | C25  | -0.573                     | H46  | 0.19                       | H67  | 0.191                      | H88   | 0.211                      |
| C5   | -0.374                     | C26  | -0.153                     | H47  | 0.188                      | H68  | 0.283                      | H89   | 0.193                      |
| C6   | -0.378                     | C27  | -0.409                     | H48  | 0.201                      | H69  | 0.203                      | H90   | 0.192                      |
| C7   | -0.379                     | C28  | -0.374                     | H49  | 0.192                      | H70  | 0.188                      | H91   | 0.192                      |
| C8   | -0.383                     | C29  | -0.376                     | H50  | 0.193                      | H71  | 0.207                      | H92   | 0.192                      |
| C9   | -0.573                     | C30  | -0.377                     | H51  | 0.193                      | H72  | 0.212                      | H93   | 0.19                       |
| C10  | -0.188                     | C31  | -0.379                     | H52  | 0.278                      | H73  | 0.192                      | H94   | 0.19                       |
| C11  | -0.415                     | C32  | -0.383                     | H53  | 0.225                      | H74  | 0.185                      | H95   | 0.189                      |
| C12  | -0.378                     | C33  | -0.573                     | H54  | 0.19                       | H75  | 0.19                       | H96   | 0.189                      |
| C13  | -0.374                     | H34  | 0.281                      | H55  | 0.182                      | H76  | 0.195                      | H97   | 0.188                      |
| C14  | -0.378                     | H35  | 0.202                      | H56  | 0.221                      | H77  | 0.19                       | H98   | 0.188                      |
| C15  | -0.379                     | H36  | 0.192                      | H57  | 0.198                      | H78  | 0.186                      | H99   | 0.194                      |
| C16  | -0.383                     | H37  | 0.202                      | H58  | 0.182                      | H79  | 0.188                      | H100  | 0.194                      |
| C17  | -0.572                     | H38  | 0.213                      | H59  | 0.186                      | H80  | 0.19                       | H101  | 0.201                      |
| C18  | -0.198                     | H39  | 0.191                      | H60  | 0.197                      | H81  | 0.188                      | BR102 | -0.905                     |
| C19  | -0.407                     | H40  | 0.186                      | H61  | 0.191                      | H82  | 0.201                      |       |                            |
| C20  | -0.377                     | H41  | 0.191                      | H62  | 0.185                      | H83  | 0.192                      |       |                            |
| C21  | -0.374                     | H42  | 0.195                      | H63  | 0.186                      | H84  | 0.193                      |       |                            |

**Table S3.** *Ab initio* calculated partial atomic charges of DDEDMEAC.

| atom | <i>q/e</i><br>B3LYP<br>NBO | atom | <i>q/e</i><br>B3LYP<br>NBO | atom | <i>q/e</i><br>B3LYP<br>NBO | atom | <i>q/e</i><br>B3LYP<br>NBO | atom | <i>q/e</i><br>B3LYP<br>NBO |
|------|----------------------------|------|----------------------------|------|----------------------------|------|----------------------------|------|----------------------------|
| C1   | -0.683                     | H18  | 0.229                      | C35  | -0.311                     | C52  | 0.747                      | H69  | 0.228                      |
| H2   | 0.234                      | H19  | 0.239                      | H36  | 0.255                      | C53  | -0.587                     | H70  | 0.221                      |
| H3   | 0.228                      | C20  | -0.470                     | H37  | 0.310                      | H54  | 0.267                      | C71  | -0.458                     |
| H4   | 0.226                      | H21  | 0.243                      | C38  | -0.484                     | H55  | 0.286                      | H72  | 0.228                      |
| C5   | -0.464                     | H22  | 0.238                      | H39  | 0.298                      | C56  | -0.467                     | H73  | 0.229                      |
| H6   | 0.236                      | C23  | -0.452                     | H40  | 0.235                      | H57  | 0.243                      | C74  | -0.465                     |
| H7   | 0.231                      | H24  | 0.250                      | H41  | 0.227                      | H58  | 0.248                      | H75  | 0.230                      |
| C8   | -0.462                     | H25  | 0.232                      | C42  | -0.482                     | C59  | -0.463                     | H76  | 0.231                      |
| H9   | 0.226                      | C26  | -0.567                     | H43  | 0.239                      | H60  | 0.239                      | N77  | -0.300                     |
| H10  | 0.229                      | H27  | 0.268                      | H44  | 0.228                      | H61  | 0.227                      | O78  | -0.518                     |
| C11  | -0.462                     | H28  | 0.271                      | H45  | 0.295                      | C62  | -0.469                     | O79  | -0.506                     |
| H12  | 0.232                      | C29  | 0.746                      | C46  | -0.299                     | H63  | 0.235                      | C80  | -0.680                     |
| H13  | 0.234                      | O30  | -0.552                     | H47  | 0.274                      | H64  | 0.236                      | H81  | 0.227                      |
| C14  | -0.463                     | O31  | -0.488                     | H48  | 0.258                      | C65  | -0.461                     | H82  | 0.233                      |

|     |        |     |        |     |        |     |        |      |        |
|-----|--------|-----|--------|-----|--------|-----|--------|------|--------|
| H15 | 0.235  | C32 | -0.193 | C49 | -0.182 | H66 | 0.234  | H83  | 0.227  |
| H16 | 0.227  | H33 | 0.258  | H50 | 0.240  | H67 | 0.229  | Cl84 | -0.822 |
| C17 | -0.465 | H34 | 0.250  | H51 | 0.262  | C68 | -0.454 |      |        |

**Table S4.** *Ab initio* calculated partial atomic charges of HEDMOAC.

| atom | $q/e$<br>B3LYP<br>NBO | atom | $q/e$<br>B3LYP<br>NBO | atom | $q/e$<br>B3LYP<br>NBO | atom | $q/e$<br>B3LYP<br>NBO | atom | $q/e$<br>B3LYP<br>NBO |
|------|-----------------------|------|-----------------------|------|-----------------------|------|-----------------------|------|-----------------------|
| N1   | -0.341                | C10  | -0.497                | H19  | 0.235                 | H28  | 0.242                 | H37  | 0.271                 |
| C2   | -0.495                | C11  | -0.278                | H20  | 0.231                 | H29  | 0.233                 | H38  | 0.267                 |
| C3   | -0.471                | C12  | -0.141                | H21  | 0.238                 | H30  | 0.235                 | H39  | 0.220                 |
| C4   | -0.465                | O13  | -0.785                | H22  | 0.241                 | H31  | 0.241                 | H40  | 0.220                 |
| C5   | -0.469                | H14  | 0.313                 | H23  | 0.234                 | H32  | 0.246                 | H41  | 0.517                 |
| C6   | -0.468                | H15  | 0.244                 | H24  | 0.231                 | H33  | 0.312                 | Cl42 | -0.869                |
| C7   | -0.478                | H16  | 0.234                 | H25  | 0.234                 | H34  | 0.242                 |      |                       |
| C8   | -0.697                | H17  | 0.252                 | H26  | 0.237                 | H35  | 0.312                 |      |                       |
| C9   | -0.495                | H18  | 0.264                 | H27  | 0.234                 | H36  | 0.244                 |      |                       |

**Table S5.** *Ab initio* calculated partial atomic charges of OMEO.

| atom | $q/e$<br>B3LYP<br>NBO | atom | $q/e$<br>B3LYP<br>NBO | atom | $q/e$<br>B3LYP<br>NBO | atom | $q/e$<br>B3LYP<br>NBO |
|------|-----------------------|------|-----------------------|------|-----------------------|------|-----------------------|
| O1   | -0.787                | C11  | -0.467                | H21  | 0.173                 | H31  | 0.233                 |
| C2   | -0.135                | C12  | -0.468                | H22  | 0.205                 | H32  | 0.233                 |
| C3   | -0.135                | C13  | -0.477                | H23  | 0.205                 | H33  | 0.233                 |
| O4   | -0.595                | C14  | -0.697                | H24  | 0.247                 | H34  | 0.234                 |
| C5   | 0.230                 | H15  | 0.505                 | H25  | 0.247                 | H35  | 0.234                 |
| O6   | -0.592                | H16  | 0.212                 | H26  | 0.234                 | H36  | 0.241                 |
| C7   | -0.110                | H17  | 0.212                 | H27  | 0.234                 | H37  | 0.234                 |
| C8   | -0.491                | H18  | 0.215                 | H28  | 0.235                 | H38  | 0.234                 |
| C9   | -0.470                | H19  | 0.215                 | H29  | 0.235                 |      |                       |
| C10  | -0.466                | H20  | 0.173                 | H30  | 0.233                 |      |                       |



**Table S6.** Self-diffusion coefficients ( $1 \times 10^{-10} m^2/s$ ) of surfactants candidate molecules calculated by *MSD*–time curves ( $\beta$  values in parentheses).

| Surfactant | Diffusion Coefficient of Anion | Surfactant | Diffusion Coefficient of Cation |
|------------|--------------------------------|------------|---------------------------------|
| SDS        | 2.10±0.25 (0.78)               | SDS        | 4.19±0.30 (0.75)                |
| HEDMOAC    | 26.13±0.65 (0.82)              | HEDMOAC    | 6.26±0.34 (0.84)                |
| DDEDMEAC   | 20.70±0.41 (0.74)              | DDEDMEAC   | 3.84 ±0.18 (0.68)               |
| TOABr      | 16.95±0.52 (0.78)              | TOABr      | 4.78±0.23 (0.76)                |
| OMEO       | 5.03±0.35 (0.82)               |            |                                 |

**Table S7.** Average cluster Size [molecules] of surfactant molecules at water/bilayer interface.

| Surfactant | Ave. surfactant cluster size [interface] | Ave. surfactant cluster size [bulk] |
|------------|------------------------------------------|-------------------------------------|
| SDS        | 5.4±0.8                                  | 3.3±1.2                             |
| TOABr      | 8.0±0.0                                  | 24.0±0.0                            |
| DDEDMEA    | 6.6±1.2                                  | 20.0±0.1                            |
| HEDMOAC    | 1.2±0.1                                  | 4.4±0.1                             |
| OMEO       | 5.8±0.7                                  | 9.0±0.1                             |
